# Supplementary material for: Dynamical analysis of sea-breeze hodograph rotation in Sardinia
Source: Copernicus journal article supplement (doi:10.5194/acp-14-13471-2014), 2014-12-18
Supplement: Supplementary file 5 [file acp-14-13471-2014-supplement.zip]

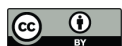

## *Supplement of*

# **Dynamical analysis of sea-breeze hodograph rotation in Sardinia**

**N. Moiseeva and D. G. Steyn**

*Correspondence to:* N. Moiseeva ([nmoiseeva@eos.ubc.ca](mailto:nmoiseeva@eos.ubc.ca))

- [acp-14-13471-2014-supplement-cover-letter.pdf](#)
- [SupplementaryAnimation.pdf](#)
- [WRF-ExtractingMomentumTerms.pdf](#)
- [\\_\\_MACOSX](#)
  - [.\\_SupplementaryAnimation.pdf](#)
  - [.\\_WRF-ExtractingMomentumTerms.pdf](#)
